# Supplementary material
Source: Springer Nature journal article supplement (https://www.springermedizin.de/resource/supplementary/13054_2009_8299_MOESM5_ESM.pdf/9731654)

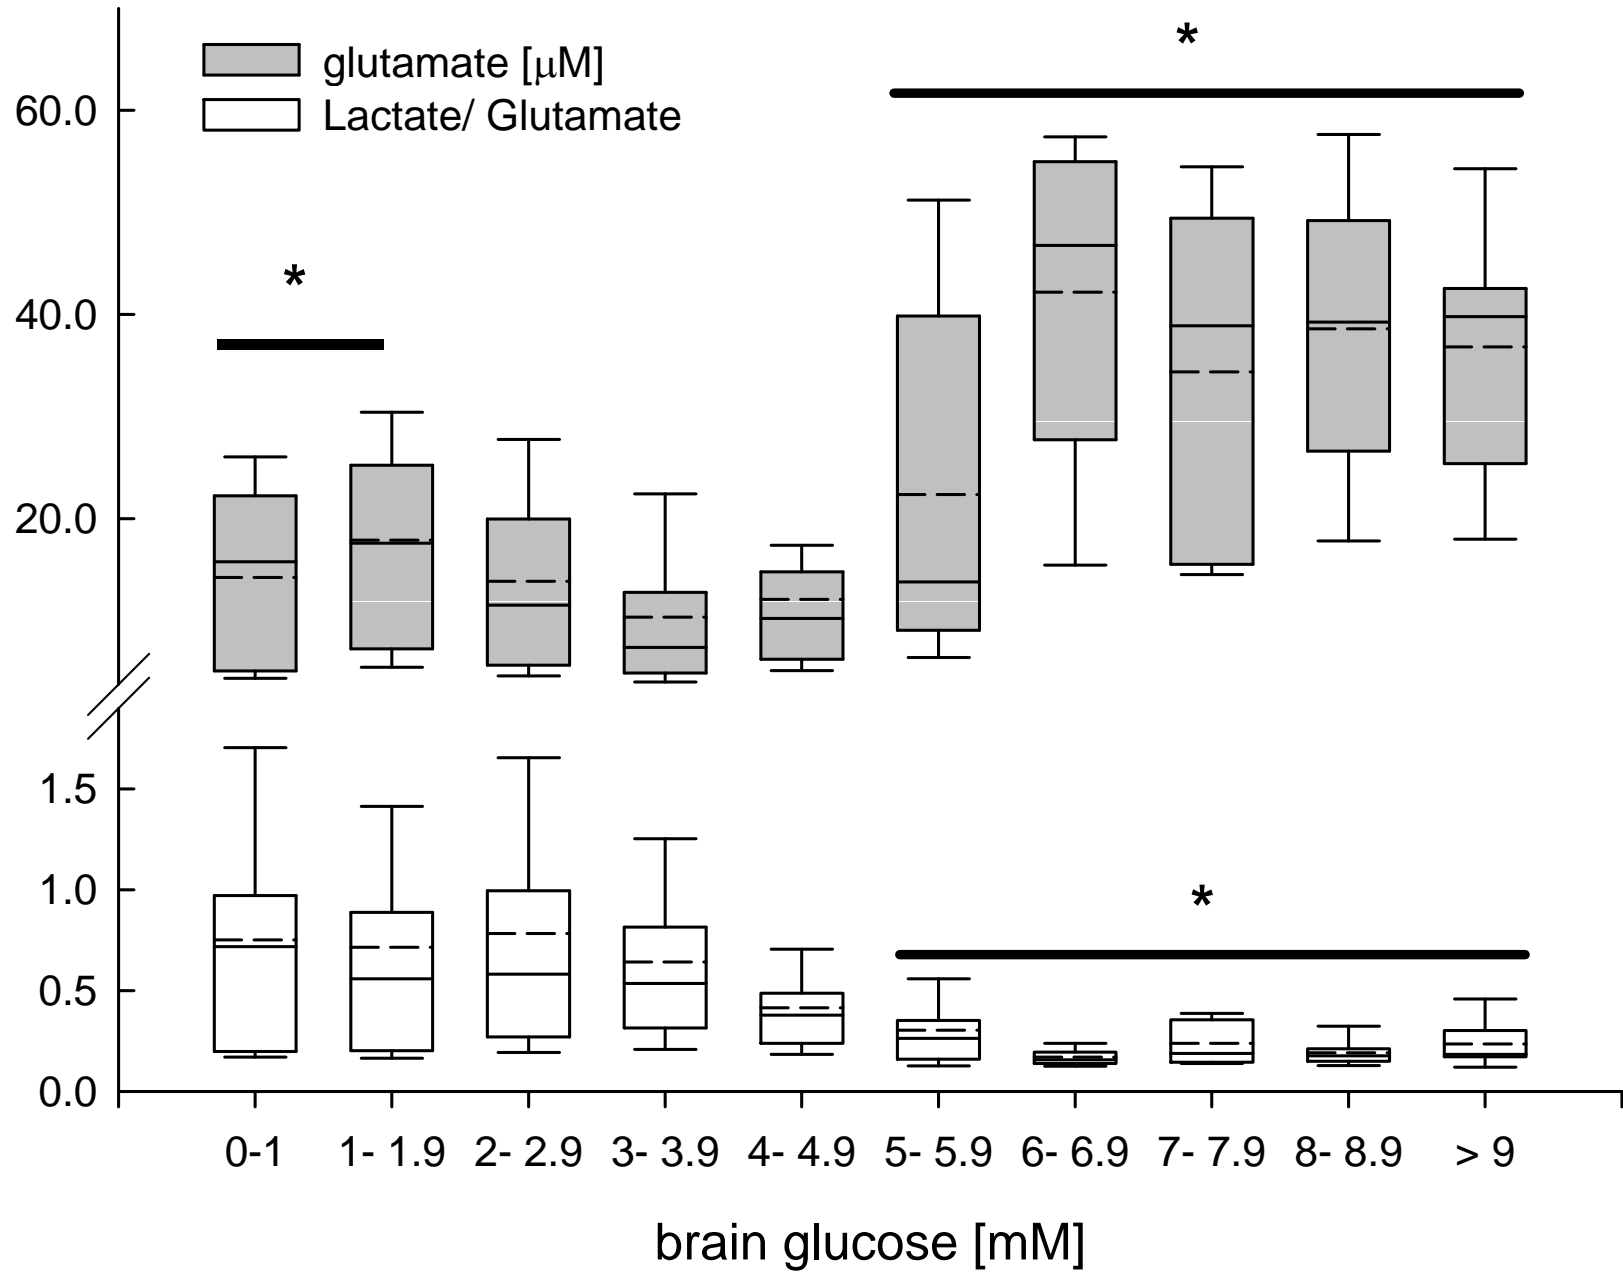

Supplement: MOESM5 [file 9731654]
